# Supplementary material
Source: PubMed Central journal article supplement (PMC4148802)

## SUPPLEMENTAL MATERIAL

**TABLE S1** Primers designed to amplify the targeted gene transcripts in *M. conradii*.

| Gene name    | Locus tag | Primer Name | Primer sequence(5'-3') |
|--------------|-----------|-------------|------------------------|
| 16S rRNA     | Mtc_r6    | H16S-F      | TACCGTGAGGCGTCTGTTAAG  |
|              |           | H16S-R      | GCCAGCAGTCTCCACAGTGTA  |
| <i>echE</i>  | Mtc_0802  | echE-F      | GGATAGAGCCTCTCCGCTTGAA |
|              |           | echE-R      | TAGCACACACCCTCTCCGAAAG |
| <i>frhA1</i> | Mtc_1001  | frhA-1F     | AAGGCTACCGAAGGCTTCCATT |
|              |           | frhA-1R     | CCACCTATCCTCCACGACCTTG |
| <i>frhA2</i> | Mtc_2127  | frhA-2F     | CACCGTCCGCATCCAGAAGA   |
|              |           | frhA-2R     | CATGCCGCCGATCCTTATGTTC |
| <i>hdrB1</i> | Mtc_1470  | hdrB-1F     | GTGAGAGCCGTGACCCATCAT  |
|              |           | hdrB-1R     | GTCCAGCACGCTACACCCTAA  |
| <i>hdrB2</i> | Mtc_2474  | hdrB-2F     | CGGAGGAGTGCGAGGCTATAAG |
|              |           | hdrB-2R     | CTGGAGGTGACAGAACGGACAA |
| <i>hdrB3</i> | Mtc_0481  | hdrB-3F     | TACGAAGTCCACCTGCTGCC   |
|              |           | hdrB-3R     | CGCCTCCTCTGCCTGAAGTAA  |
| <i>mvhA1</i> | Mtc_0109  | mvhA-1F     | GGCATGGCGTTCTCGCTTAC   |
|              |           | mvhA-1R     | CGTTCACCAGGTCTGCGTACT  |
| <i>mvhA2</i> | Mtc_2479  | mvhA-2F     | CGTGTATCCGACTCCTACCTT  |
|              |           | mvhA-2R     | ACTCCTGAAGCTCGGCGTTAG  |
| <i>vhtG</i>  | Mtc_0470  | vhtG-F      | CCCTACCAGGCGATGGAATGAT |
|              |           | vhtG-R      | TGCTCTCCACCTTGCTGAAGAA |
| <i>mcrA</i>  | Mtc_0908  | mcrA-F      | ATCTGGCTCGGCTCCTACATG  |
|              |           | mcrA-R      | GGCTTGGTCGGCATCTTGTAC  |
| <i>mtrH</i>  | Mtc_0943  | mtrH-F      | GCAAAGAGGGCGGACGAGAT   |
|              |           | mtrH-R      | CGATGGCAGCGGTGAACTTC   |
| <i>mtd</i>   | Mtc_1592  | Mtd-F       | CCGAACCTGCCGCAGATAGT   |
|              |           | Mtd-R       | ACGTCGATGTCGCCAACCTT   |
| <i>mer</i>   | Mtc_0135  | mer-F       | TCGACCAGGACGCCAAGAAG   |
|              |           | mer-R       | CCGCCTTAATCGTGCCAACC   |
| <i>fwdB</i>  | Mtc_2470  | fwdB-F      | GGAGGATGGCACCCTGAGTT   |
|              |           | fwdB-R      | TCGCACGACGTTGAAGACCA   |
| <i>fmdB</i>  | Mtc_0163  | fmdB-F      | GGTCAAGCAGGAGCAGGAAGT  |
|              |           | fmdB-R      | CCATCAGGCAAGCGTTCTTCG  |
| <i>fdhA</i>  | Mtc_2125  | fdhA-F      | AATATGCCTGCTCGCCCAGAA  |
|              |           | fdhA-R      | TCGGAGCCTCTCGTAGGTCAT  |
| <i>porA1</i> | Mtc_0842  | porA-1F     | TACCGGCCATTCCTCCGCTGA  |
|              |           | porA-1R     | CGCGAAGCCCTTCCTTGCCA   |
| <i>porA2</i> | Mtc_1765  | porA-2F     | GCCTGCCATGGTCTGCCTGG   |
|              |           | porA-2R     | CCCGCTTCATGGCGTCGTGT   |
| <i>acs1</i>  | Mtc_1904  | acs-1F      | ATGGGCAAAGGCCGTGTGGG   |
|              |           | acs-1R      | CTCACCCGCCACCACGCAAT   |
| <i>acs2</i>  | Mtc_2228  | acs-2F      | TGGAGCCGGGAGACCTGAGC   |
|              |           | acs-2R      | CCCATCCCGGGTCAGCCGTA   |
| <i>ppa</i>   | Mtc_1504  | ppa-F       | GGGGCAGCCGGTAGACCTGA   |
|              |           | ppa-R       | ATGGCTGCAAGGGCCGTCAC   |

**TABLE S2** Genes encoding enzymes for hydrogenotrophic methanogenesis pathway in *M. conradii*.

| <b>Enzyme</b>                                                                             | <b>gene or gene cluster</b>    | <b>Locus tag</b> |
|-------------------------------------------------------------------------------------------|--------------------------------|------------------|
| Energy-converting hydrogenase                                                             | <i>echABCDEFG</i>              | Mtc_0806-0801    |
| Methanophenazine-reducing [NiFe] hydrogenase                                              | <i>vhtGCA</i>                  | Mtc_0470-0472    |
|                                                                                           | <i>vhtD</i>                    | Mtc_2406         |
|                                                                                           | <i>frhA2DG2B2</i>              | Mtc_2127-2130    |
| Coenzyme F <sub>420</sub> -reducing hydrogenase                                           | <i>frhB1G1A1</i>               | Mtc_0999-1001    |
|                                                                                           | <i>frhB3</i>                   | Mtc_1195         |
|                                                                                           | <i>mvhG2A2</i>                 | Mtc_2478-2479    |
| Coenzyme F <sub>420</sub> -non-reducing hydrogenase (methylviologen-reducing hydrogenase) | <i>mvhA1G1</i>                 | Mtc_0109&0111    |
|                                                                                           | <i>mvhD2</i>                   | Mtc_2472         |
| CoB-CoM heterodisulfide reductase                                                         | <i>hdrA2B2C2</i>               | Mtc_2473-2475    |
|                                                                                           | <i>hdrC1 hdrA1/mvhD1 hdrB1</i> | Mtc_1469-1471    |
|                                                                                           | <i>hdrB3</i>                   | Mtc_0481         |
|                                                                                           | <i>hdrC-like</i>               | Mtc_p13          |
| Formylmethanofuran dehydrogenase (tungsten containing)                                    | <i>fwdCABD</i>                 | Mtc_2468-2471    |
|                                                                                           | <i>fwdFG</i>                   | Mtc_2476-2477    |
|                                                                                           | <i>fwdE1</i>                   | Mtc_0156         |
|                                                                                           | <i>fwdE2</i>                   | Mtc_1680         |
|                                                                                           | <i>fwdE3</i>                   | Mtc_1818         |
| Formylmethanofuran dehydrogenase (molybdenum containing)                                  | <i>fmdBD</i>                   | Mtc_0163-0164    |
|                                                                                           | <i>fmdE</i>                    | Mtc_0160         |
| Formylmethanofuran:H <sub>4</sub> MPT formyltransferase                                   | <i>fr</i>                      | Mtc_1916         |
|                                                                                           | <i>mch1</i>                    | Mtc_1063         |
| Methenyl-H <sub>4</sub> MPT cyclohydrolase                                                | <i>mch2</i>                    | Mtc_1978         |
| Methylene-H <sub>4</sub> MPT dehydrogenase                                                | <i>mtd</i>                     | Mtc_1592         |
| Methylene-H <sub>4</sub> MPT reductase                                                    | <i>mer</i>                     | Mtc_0135         |
| Methyl-H <sub>4</sub> MPT:coenzyme M methyltransferase                                    | <i>mtrEDCBA1FGH</i>            | Mtc_0936-0943    |
|                                                                                           | <i>mtrA2</i>                   | Mtc_0962         |
| putative methyltransferase mtX                                                            | <i>mtxX</i>                    | Mtc_0232         |
| Methyl-coenzyme M reductase                                                               | <i>mcrBDCGA</i>                | Mtc_0904-0908    |
| Formate dehydrogenase                                                                     | <i>fdhBAC</i>                  | Mtc_2124-2125    |
|                                                                                           | <i>fdhD1&amp;D2</i>            | Mtc_0165 & 0273  |

## SUPPLEMENTAL FIGURE LEGENDS

**FIGURE S1** Hydrogenase encoding gene clusters and methanogenesis-associated gene clusters in *M. conradii* according to the annotation of the *M. conradii* genome (1). Red coloration indicates the catalytic sites and blue coloration and blue arrows highlight the genes in a large transcription unit corresponding to the description below the genes.

A), Energy-converting hydrogenase [NiFe] [FeS] (Ech)

B), MP-reducing hydrogenase [Cytb] [NiFe][FeS] (Vht, membrane-integrated)

C), F<sub>420</sub>-reducing hydrogenase [NiFe] [FeS] (Frh)

D), F<sub>420</sub>-non-reducing hydrogenase [NiFe] [FeS] (Mvh, methyl viologen-reducing hydrogenase)

E), CHO-MFR dehydrogenase [Mo] [MPT] [FeS] (Fmd)

F), Formate dehydrogenase (Fdh)

G), CHO-MFR dehydrogenase [W] [MPT] [FeS] (Fwd)

H), CHO-MFR:H<sub>4</sub>MPT formyltransferase (Ftr) and Methenyl-H<sub>4</sub>MPT cyclohydrolase [Ca<sup>2+</sup>] (Mch)

I), Methylene-H<sub>4</sub>MPT dehydrogenase (Mtd) and Methylene-H<sub>4</sub>MPT reductase (Mer)

J), Methyl-H<sub>4</sub>MPT:CoM methyltransferase [B<sub>12</sub>(Co<sup>1+</sup>)] (Mtr)

K), Methyl-CoM reductase [F<sub>430</sub>(Ni<sup>1+</sup>)] (Mcr)

L), Heterodisulfide reductase [FeS] [Zn<sup>2+</sup>] (Hdr) and Ech-like hydrogenase

### Reference:

1, Lü, Z., and Y. H. Lu. 2012. Complete genome sequence of a thermophilic methanogen, *Methanocella conradii* HZ254, isolated from Chinese rice field soil. J. Bacteriol. **194**:2398-2399.

FIGURE S1

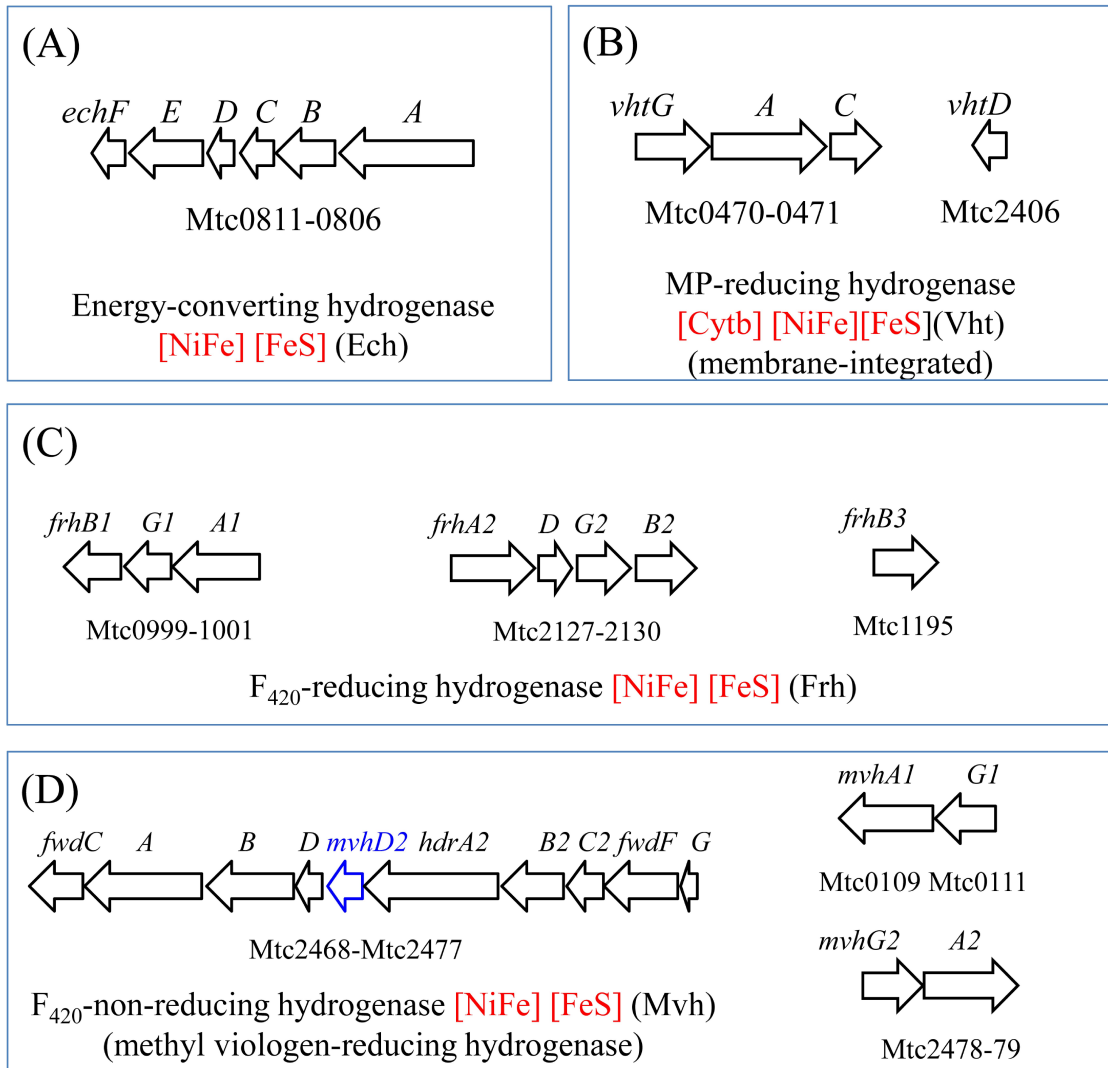

FIGURE S1 CONTINUED

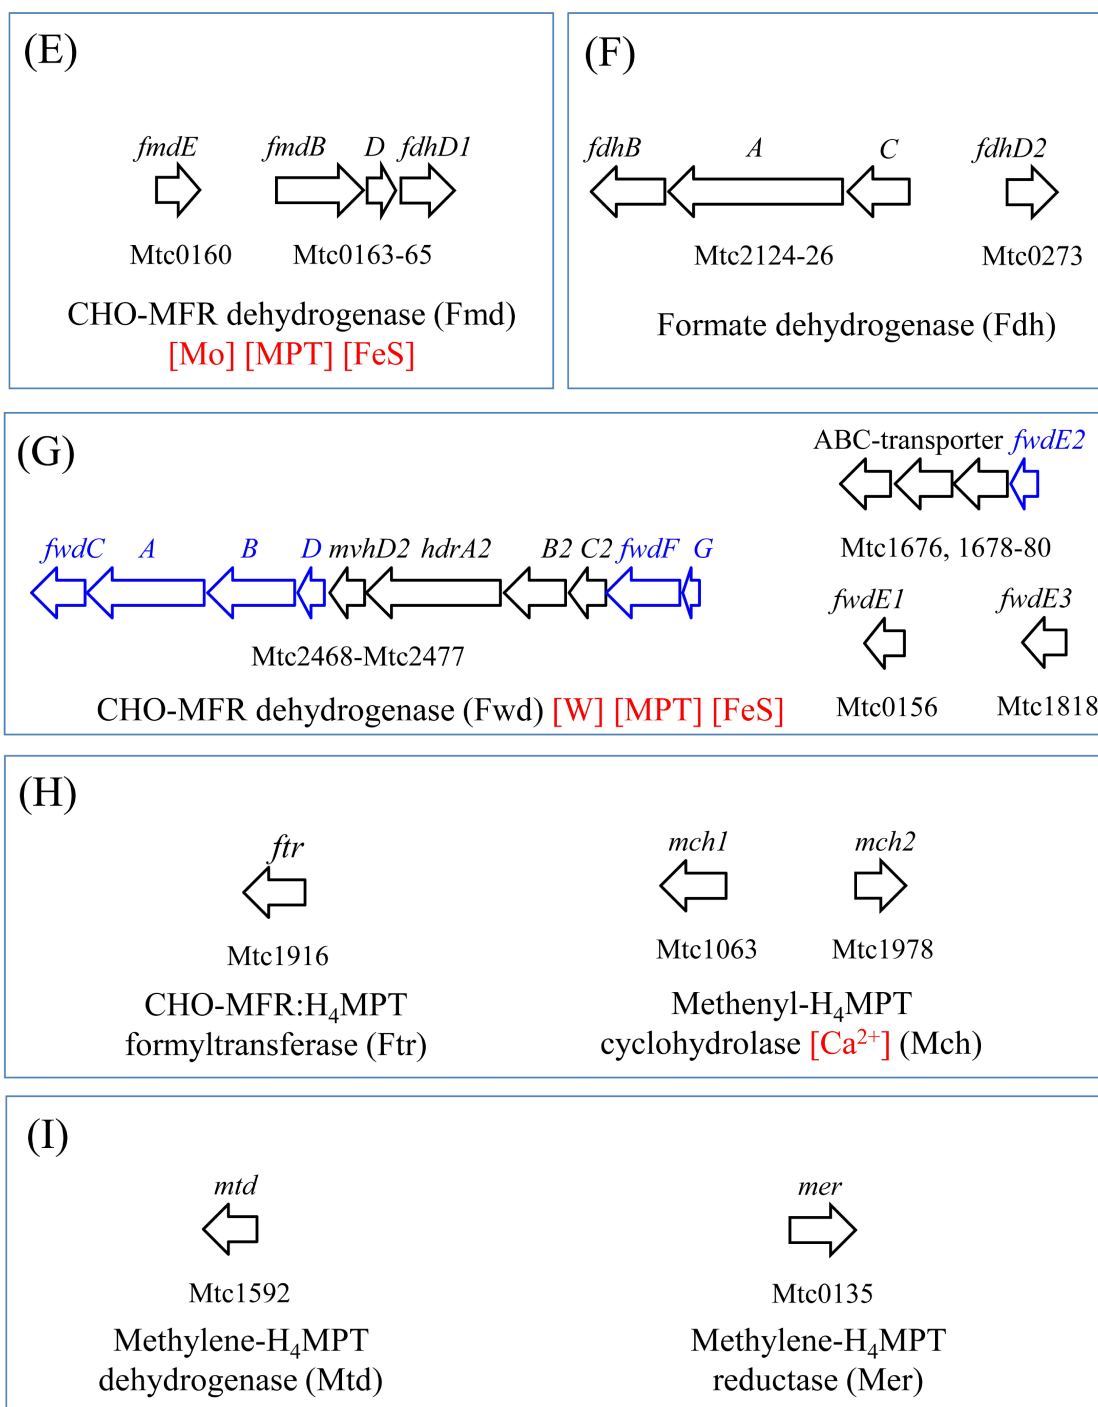

FIGURE S1 CONTINUED

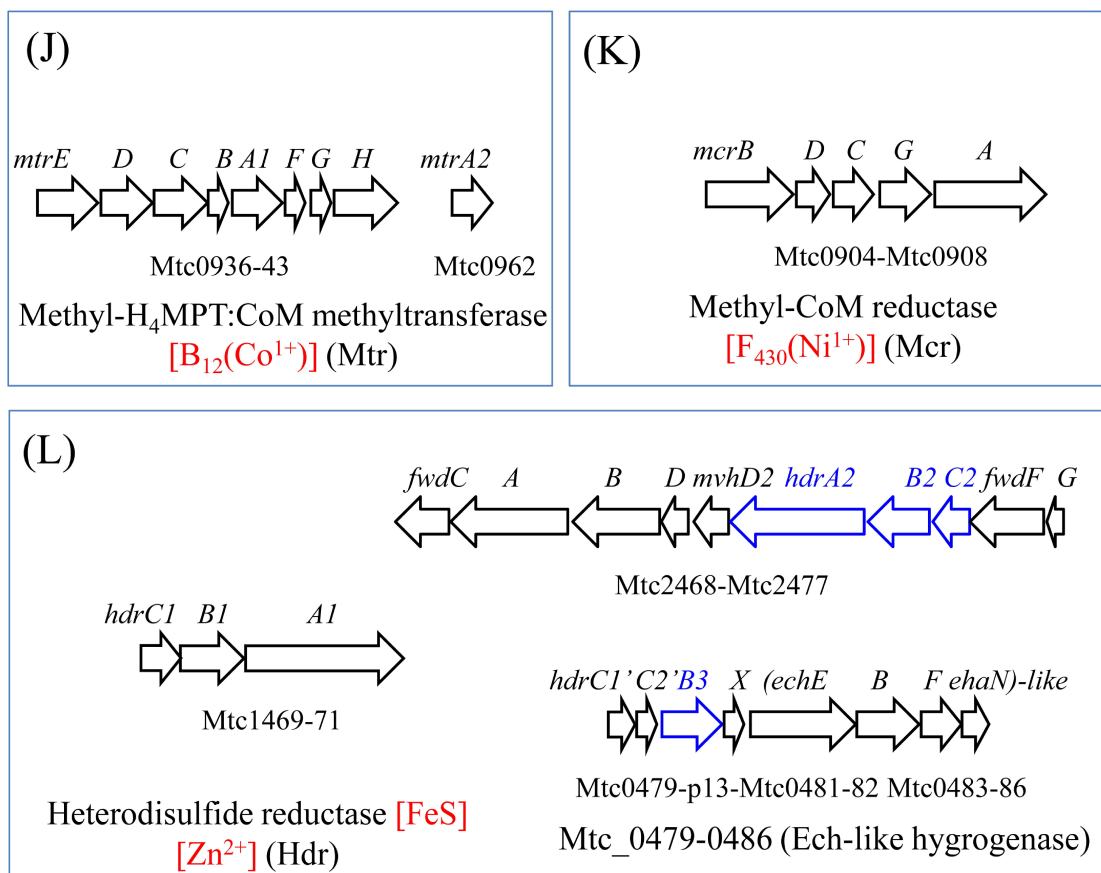

Supplement: AEM.01259-14_zam999105529so1.pdf [file AEM.01259-14_zam999105529so1.pdf]
